# Supplementary material for: Culture-free Antibiotic-susceptibility Determination From Single-bacterium Raman Spectra
Source: PubMed Central journal article supplement (PMC5834538; doi:10.1038/s41598-018-22392-9), 2018-03-02
Supplement: 41598_2018_22392_MOESM1_ESM.pdf [file 41598_2018_22392_MOESM1_ESM.pdf]

# Culture-free antibiotic-susceptibility determination from single-bacterium Raman spectra

A. Novelli Rousseau<sup>a\*§</sup>, I. Espagnon<sup>b\*§</sup>, D. Filiputti<sup>a</sup>, O. Gal<sup>b</sup>, A. Douet<sup>c</sup>, F. Mallard<sup>a</sup>, Q. Josso<sup>a§</sup>

<sup>a</sup> bioMérieux, Applied Research Department., 5 rue des Berges, 38024 Grenoble, France

<sup>b</sup> CEA, LIST, Département Métrologie, Instrumentation et Information, 91191 Gif-sur-Yvette, France

<sup>c</sup> Bioaster, 40 avenue Tony Garnier, 69007 Lyon, France

\*Contributed equally to this work

§ Corresponding authors

## Supplementary Figures

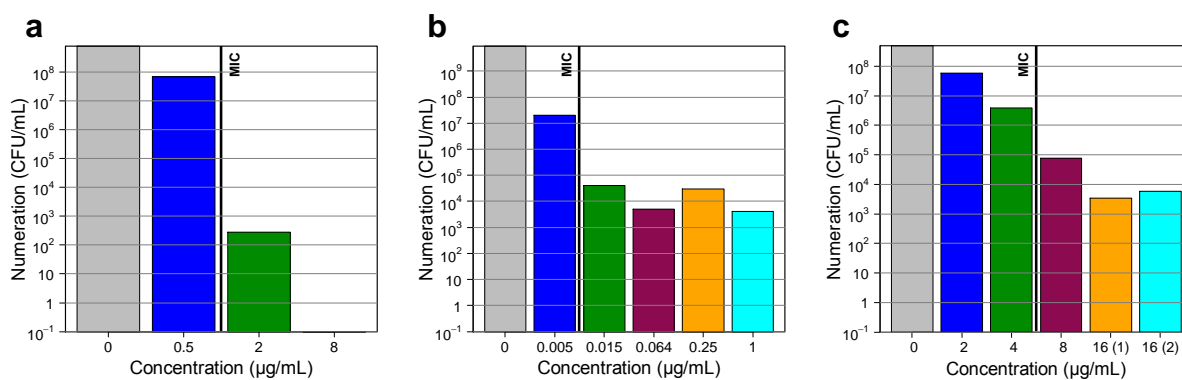

**Supplementary Figure 1. Numerations obtained in viability tests after 2-h incubation with (a) gentamicin, (b) ciprofloxacin, (c) amoxicillin, at same concentrations as in Fig. 3. Initial bacteria concentration before incubation:  $3 \times 10^7$  CFU/mL.**

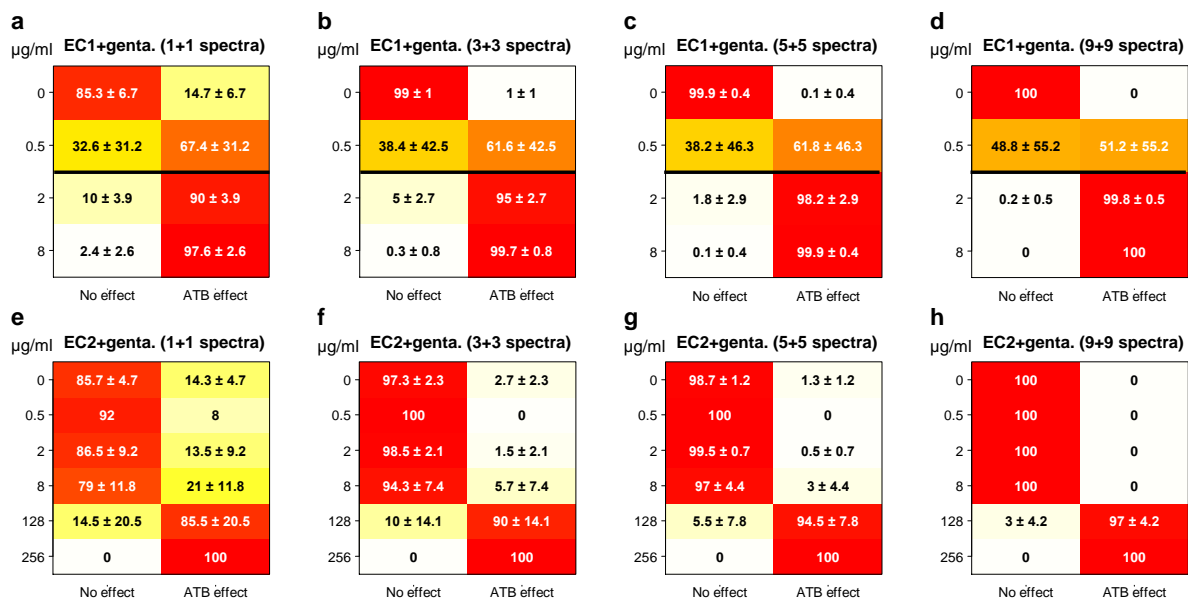

**Supplementary Figure 2.** Confusion matrices for discrimination between classes “No effect” and “ATB effect” obtained at different gentamicin concentrations (**a-d**) for susceptible strain EC1 and (**e-h**) for resistant strain EC2, (**a, e**) using 1 spectrum with antibiotic and 1 spectrum without antibiotic – i.e. 1 + 1 spectra –, or (**b, f**) using 3 + 3 spectra, or (**c, g**) using 5 + 5 spectra, or (**d, h**) using 9 + 9 spectra. Black line shows MIC value (1  $\mu\text{g/mL}$ ) for susceptible strain. For resistant strain EC2 (**e-h**), the complete transition is observed between 128 and 256  $\mu\text{g/mL}$ .

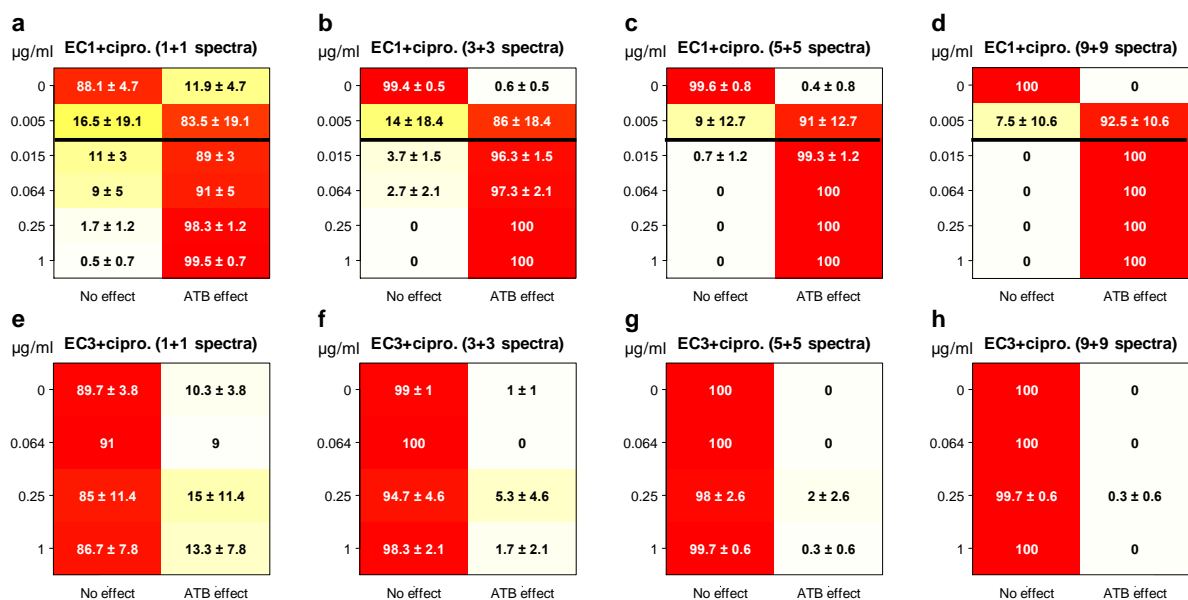

**Supplementary Figure 3.** Confusion matrices for discrimination between classes “No effect” and “ATB effect” obtained at different ciprofloxacin concentrations (**a-d**) for susceptible strain EC1 and (**e-h**) for resistant strain EC3, (**a, e**) using 1 spectrum with antibiotic and 1 spectrum without antibiotic – i.e. 1 + 1 spectra –, or (**b, f**) using 3 + 3 spectra, or (**c, g**) using 5 + 5 spectra, or (**d, h**) using 9 + 9 spectra. Black line shows MIC value (0.008  $\mu\text{g/mL}$ ) for susceptible strain.

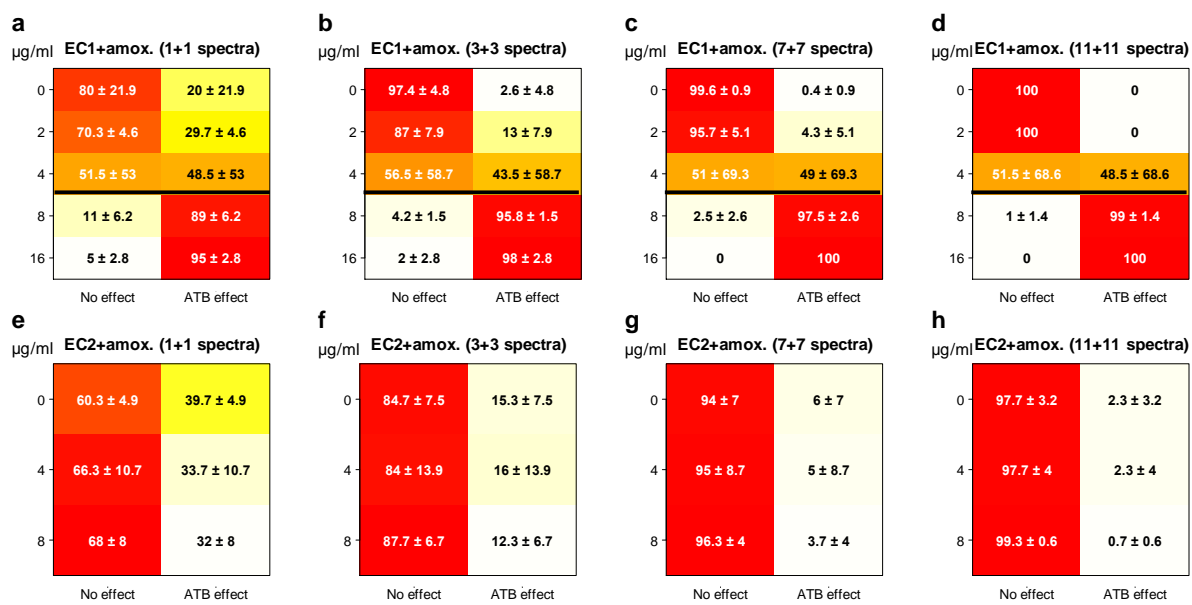

**Supplementary Figure 4.** Confusion matrices for discrimination between classes “No effect” and “ATB effect” obtained at different amoxicillin concentrations (**a-d**) for susceptible strain EC1 and (**e-h**) for resistant strain EC2, (**a, e**) using 1 spectrum with antibiotic and 1 spectrum without antibiotic – i.e. 1 + 1 spectra –, or (**b, f**) using 3 + 3 spectra, or (**c, g**) using 7 + 7 spectra, or (**d, h**) using 11 + 11 spectra. Black line shows MIC value (6 µg/mL) for susceptible strain.
